# Supplementary material for: The rs1126616 Single Nucleotide Polymorphism of the Osteopontin Gene Is Independently Associated with Cardiovascular Events in a Chronic Kidney Disease Cohort
Source: MDPI journal article supplement (doi:10.3390/jcm8050592), 2019-04-29
Supplement: s1 [file s1]

## SUPPLEMENTAL FILES

**Supplemental Table S1: Hardy–Weinberg equilibrium for the five *SPP1* SNPs analyzed**

|                   | Homozygote Reference |          | Heterozygote |          | Homozygote variant |          | <i>p</i> value |
|-------------------|----------------------|----------|--------------|----------|--------------------|----------|----------------|
|                   | Observed             | Expected | Observed     | Expected | Observed           | Expected |                |
| <b>rs9138</b>     | 1352                 | 1348.6   | 1130         | 1136.8   | 243                | 239.6    | 0.753          |
| <b>rs1126616</b>  | 1312                 | 1320.2   | 1168         | 1151.7   | 243                | 251.2    | 0.459          |
| <b>rs11730582</b> | 223                  | 236.3    | 535          | 508.3    | 260                | 273.3    | 0.094          |
| <b>rs28357094</b> | 133                  | 128.8    | 798          | 806.5    | 1267               | 1262.8   | 0.622          |
| <b>rs1126772</b>  | 908                  | 915.9    | 570          | 554.3    | 76                 | 83.9     | 0.263          |

Comparison between groups by means of a Chi-squared test.

**Supplemental Table S2:** Genetic polymorphism of *SPP1* rs1126772 A>G in association with CVE in chronic kidney disease (CKD) patients.

| Model                 | Genotype | No CVE<br>N = 1507<br><i>n</i> (%) | CVE<br>N = 106<br><i>n</i> (%) | Odds ratio (95% CI) | <i>p</i> value | AIC   |
|-----------------------|----------|------------------------------------|--------------------------------|---------------------|----------------|-------|
| Co-dominant           | AA       | 903 (59.9%)                        | 49 (46.2%)                     | 1.00                | 0.016          | 779.8 |
|                       | AG       | 529 (35.1%)                        | 52 (49.1%)                     | 1.81 (1.21–2.72)*   |                |       |
|                       | GG       | 75 (5%)                            | 5 (4.7%)                       | 1.23 (0.48–3.18)    |                |       |
| Dominant              | AA       | 903(59.9)                          | 49(46.2)                       | 1.00                | 0.006          | 778.5 |
|                       | AG-GG    | 604(40.1)                          | 57(53.8)                       | 1.74 (1.17–2.58)*   |                |       |
| Recessive             | AA-AG    | 1432(95)                           | 101(95.3)                      | 1.00                | 0.9            | 786   |
|                       | GG       | 75(5)                              | 5(4.7)                         | 0.95 (0.37–2.39)    |                |       |
| Over dominant         | AA-GG    | 978(64.9)                          | 54(50.9)                       | 1.00                | 0.004          | 778   |
|                       | AG       | 529(35.1)                          | 52(49.1)                       | 1.78 (1.20–2.64)*   |                |       |
| Log-Additive          | ---      | ---                                | ---                            | 1.43 (1.05–1.96)*   | 0.027          | 781.1 |
| HWE ( <i>p</i> value) | ---      | 0.88                               | 0.098                          | ---                 | ---            | ---   |

\*Significant odds ratio. The *p* value is obtained by comparison of Akaike information criterion (AIC) from different models; CVE, cardiovascular events; HWE, Hardy–Weinberg equilibrium.

**Supplemental Table S3:** Genetic polymorphism of *SPP1* rs1126616 C>T in association with CVE in CKD patients.

| Model                 | Genotype | No CVE<br>N = 2609<br><i>n</i> (%) | CVE<br>N = 206<br><i>n</i> (%) | Odds ratio (95% CI) | <i>p</i> value | AIC    |
|-----------------------|----------|------------------------------------|--------------------------------|---------------------|----------------|--------|
| Co-dominant           | CC       | 1276 (48.9%)                       | 87 (42.2%)                     | 1.00                | 0.062          | 1474.3 |
|                       | CT       | 1097 (42%)                         | 104 (50.5%)                    | 1.39 (1.03–1.87)*   |                |        |
|                       | TT       | 236 (9.1%)                         | 15 (7.3%)                      | 0.93 (0.53–1.64)    |                |        |
| Dominant              | CC       | 1276 (48.9%)                       | 87 (42.2%)                     | 1.00                | 0.064          | 1474.4 |
|                       | CT-TT    | 1333 (51.1%)                       | 119 (57.8%)                    | 1.31 (0.98–1.74)    |                |        |
| Recessive             | CC-CT    | 2373 (91%)                         | 191 (92.7%)                    | 1.00                | 0.38           | 1477.1 |
|                       | TT       | 236 (9.1%)                         | 15 (7.3%)                      | 0.79 (0.46–1.36)    |                |        |
| Over dominant         | CC-TT    | 1512 (58%)                         | 102 (49.5%)                    | 1.00                | 0.019          | 1472.4 |
|                       | CT       | 1097 (42%)                         | 104 (50.5%)                    | 1.41 (1.06–1.87)*   |                |        |
| Log-Additive          | ---      | ---                                | ---                            | 1.12 (0.90–1.39)    | 0.3            | 1476.8 |
| HWE ( <i>p</i> value) | ---      | 1                                  | 0.039                          | ---                 | ---            | ---    |

\*Significant odds ratio. The *p* value is obtained by comparison of Akaike information criterion (AIC) from different models; CVE, cardiovascular events.

**Supplemental Table S4:** Genetic polymorphism of *SPP1* rs9138 A>C in association with CVE in CKD patients.

| Model         | Genotype | No CVE<br>N = 2609<br>n (%) | CVE<br>N = 206<br>n (%) | Odds ratio (95% CI) | p value | AIC    |
|---------------|----------|-----------------------------|-------------------------|---------------------|---------|--------|
| Co-dominant   | AA       | 1313 (50.3%)                | 91 (44.2%)              | 1.00                | 0.086   | 1475.3 |
|               | AC       | 1062 (40.7%)                | 100 (48.5%)             | 1.36 (1.01–1.83)*   |         |        |
|               | CC       | 236 (9%)                    | 15 (7.3%)               | 0.92 (0.52–1.61)    |         |        |
| Dominant      | AA       | 1313 (50.3%)                | 91 (44.2%)              | 1.00                | 0.091   | 1475.3 |
|               | AC-CC    | 1298 (49.7%)                | 115 (55.8%)             | 1.28 (0.96–1.70)    |         |        |
| Recessive     | AA-AC    | 2375 (91%)                  | 191 (92.7%)             | 1.00                | 0.38    | 1477.4 |
|               | CC       | 236 (9%)                    | 15 (7.3%)               | 0.79 (0.46–1.36)    |         |        |
| Over dominant | AA-CC    | 1549 (59.3%)                | 106 (51.5%)             | 1.00                | 0.028   | 1473.3 |
|               | AC       | 1062 (40.7%)                | 100 (48.5%)             | 1.38 (1.04–1.83)*   |         |        |
| Log-Additive  | ---      | ---                         | ---                     | 1.11 (0.89–1.37)    | 0.36    | 1477.3 |
| HWE (p value) | ---      | 0.32                        | 0.11                    | ---                 | ---     | ---    |

\*Significant odds ratio. The p value is obtained by comparison of Akaike information criterion (AIC) from different models. CVE, cardiovascular events.

**Supplemental Table S5:** Genetic polymorphism of *SPP1* rs11730582 C>T in association with CVE in CKD patients.

| Model         | Genotype | No CVE<br>N = 2609<br>n (%) | CVE<br>N = 206<br>n (%) | Odds ratio (95% CI) | p value | AIC   |
|---------------|----------|-----------------------------|-------------------------|---------------------|---------|-------|
| Co-dominant   | CC       | 224(22.4%)                  | 12(23.1%)               | 1.00                | 0.72    | 419.3 |
|               | CT       | 514(51.5%)                  | 29(55.8%)               | 1.05 (0.53–2.10)    |         |       |
|               | TT       | 260(26.1%)                  | 11(21.1%)               | 0.79 (0.34–1.82)    |         |       |
| Dominant      | CC       | 224(22.4%)                  | 12(23.1%)               | 1.00                | 0.92    | 417.9 |
|               | CT-TT    | 774(77.6%)                  | 40(76.9%)               | 0.96 (0.50–1.87)    |         |       |
| Recessive     | CC-CT    | 738(74%)                    | 41(78.8%)               | 1.00                | 0.42    | 417.3 |
|               | TT       | 260(26.1%)                  | 11(21.1%)               | 0.76 (0.39–1.50)    |         |       |
| Over dominant | CC-TT    | 484(48.5%)                  | 23(44.2%)               | 1.19 (0.68–2.08)    | 0.55    | 417.6 |
|               | CT       | 514(51.5%)                  | 29(55.8%)               | 1.19 (0.68–2.08)    |         |       |
| Log-Additive  | ---      | ---                         | ---                     | 0.89 (0.60–1.33)    | 0.58    | 417.6 |
| HWE (p value) | ---      | 0.34                        | 0.58                    | ---                 | ---     | ---   |

\*Significant odds ratio. The p value is obtained by comparison of Akaike information criterion (AIC) from different models.

**Supplemental Table S6:** Genetic polymorphism of *SPP1* rs28357094 G/T in association with CVE in CKD patients

| Model         | Genotype | No CVE<br>N = 2609<br>n (%) | CVE<br>N = 206<br>n (%) | Odds ratio (95% CI) | p value | AIC    |
|---------------|----------|-----------------------------|-------------------------|---------------------|---------|--------|
| Co-dominant   | GG       | 126(6%)                     | 8(5.3%)                 | 1.00                | 0.7     | 1113.2 |
|               | GT       | 751(35.7%)                  | 59(39.1%)               | 1.24 (0.58–2.65)    |         |        |
|               | TT       | 1225(58.3%)                 | 84(55.6%)               | 1.08 (0.51–2.28)    |         |        |
| Dominant      | GG       | 126(6%)                     | 8(5.3%)                 | 1.00                | 0.72    | 1111.7 |
|               | GT-TT    | 1976(94%)                   | 143(94.7%)              | 1.14 (0.55–2.38)    |         |        |
| Recessive     | GG-GT    | 877(41.7%)                  | 67(44.4%)               | 1.00                | 0.52    | 1111.5 |
|               | TT       | 1225(58.3%)                 | 84(55.6%)               | 0.90 (0.64–1.25)    |         |        |
| Over dominant | GG-TT    | 1351(64.3%)                 | 92(60.9%)               | 1.00                | 0.41    | 1111.2 |
|               | GT       | 751(35.7%)                  | 59(39.1%)               | 1.15 (0.82–1.62)    |         |        |
| Log-Additive  | ---      | ---                         | ---                     | 0.95 (0.73–1.24)    | 0.7     | 1111.7 |
| HWE (p value) | ---      | 0.44                        | 0.67                    | ---                 | ---     | ---    |

\*Significant odds ratio. The p value is obtained by comparison of Akaike information criterion (AIC) from different models.
